# Supplementary material for: Characterization and Optimization of Multiomic Single-Cell Epigenomic Profiling
Source: Preprints.org preprint supplement (doi:10.20944/preprints202305.0530.v1), 2023-05-08

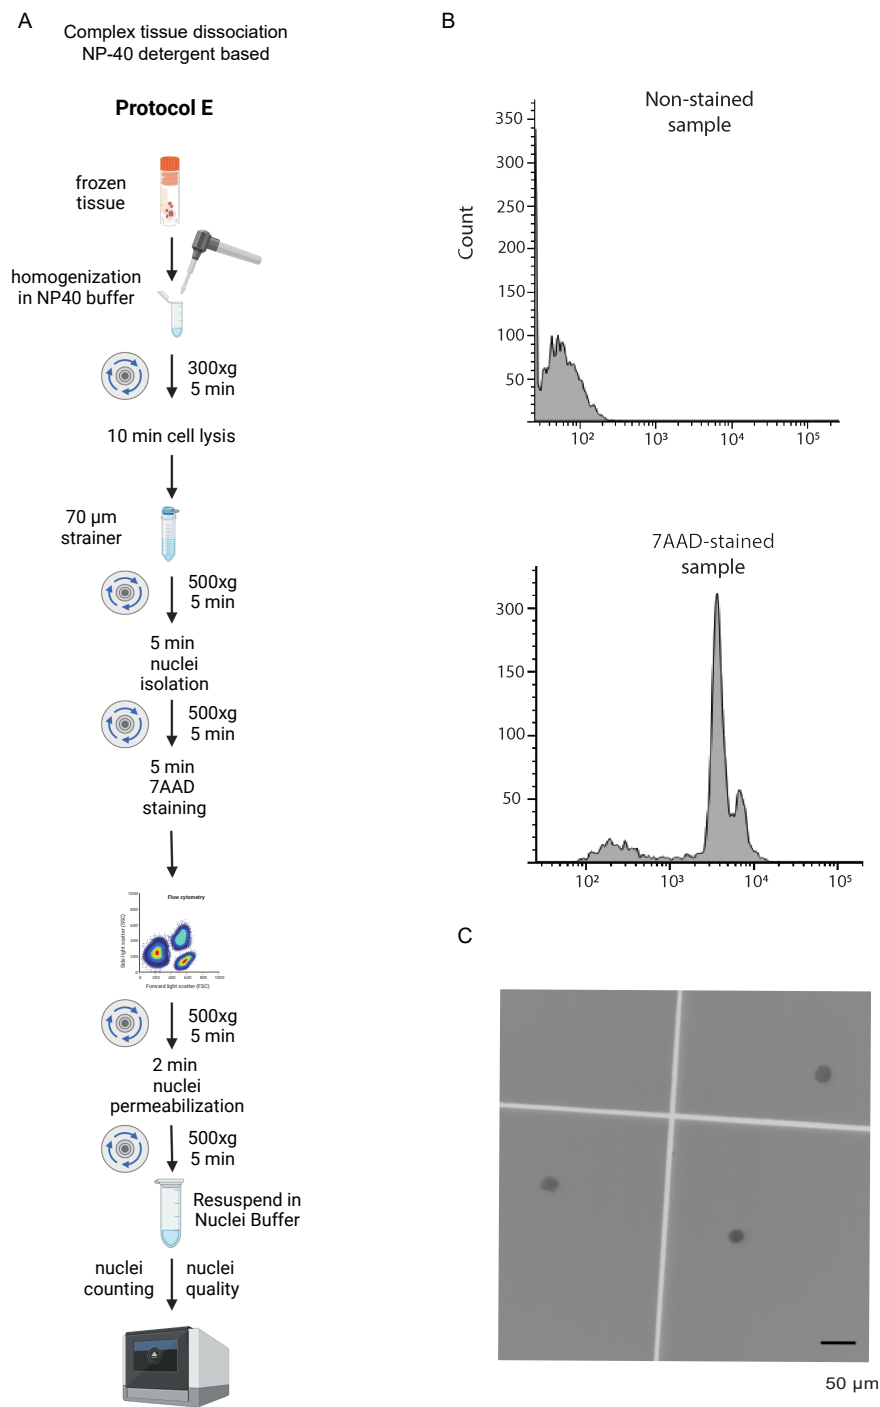

**Figure S1.** (A) Schematic of the main steps of single nuclei isolation protocol E. (B) FACS histogram analyses of non-stained and 7-AAD stained samples from ovarian cancer tissue. (C) Representative nuclei obtained from the preparation done on ovarian cancer tissue following protocol E. Scale bar represents 50 µm. Protocol E n=1.

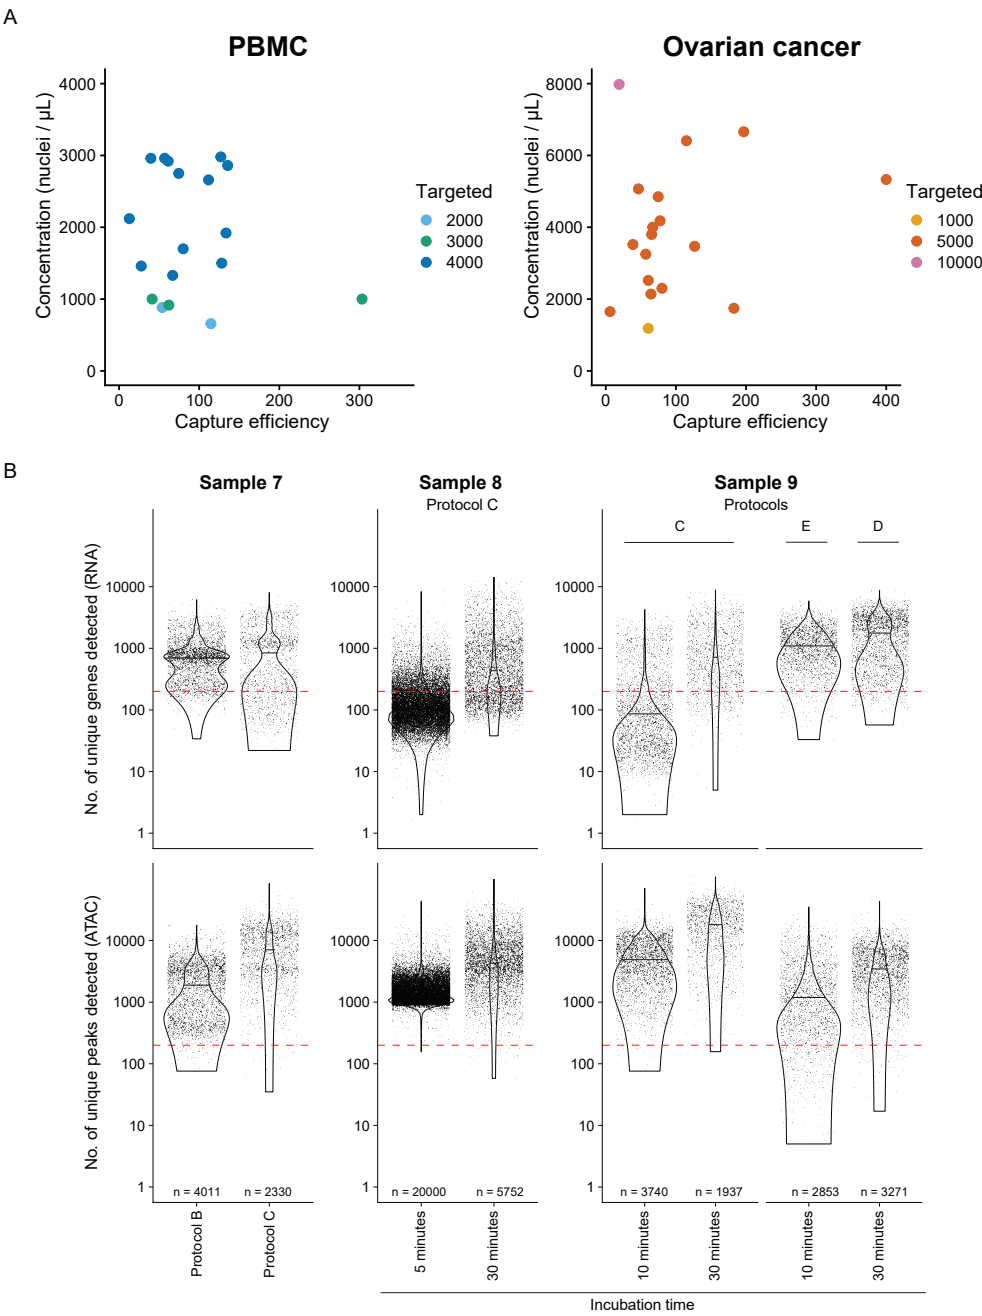

**Figure S2.** (A) Capture efficiency of each sample, defined as the ratio of cells called by Cell Ranger ARC to the targeted number of cells plotted against the nuclei concentration colored by the targeted number of cells. (B) Violin plots showing the number of unique genes detected (RNA) and the number of unique peaks detected (ATAC) calculated per cell in Samples 7, 8, and 9 grouped by protocol. The number of cells in each group is listed below the violins plots.

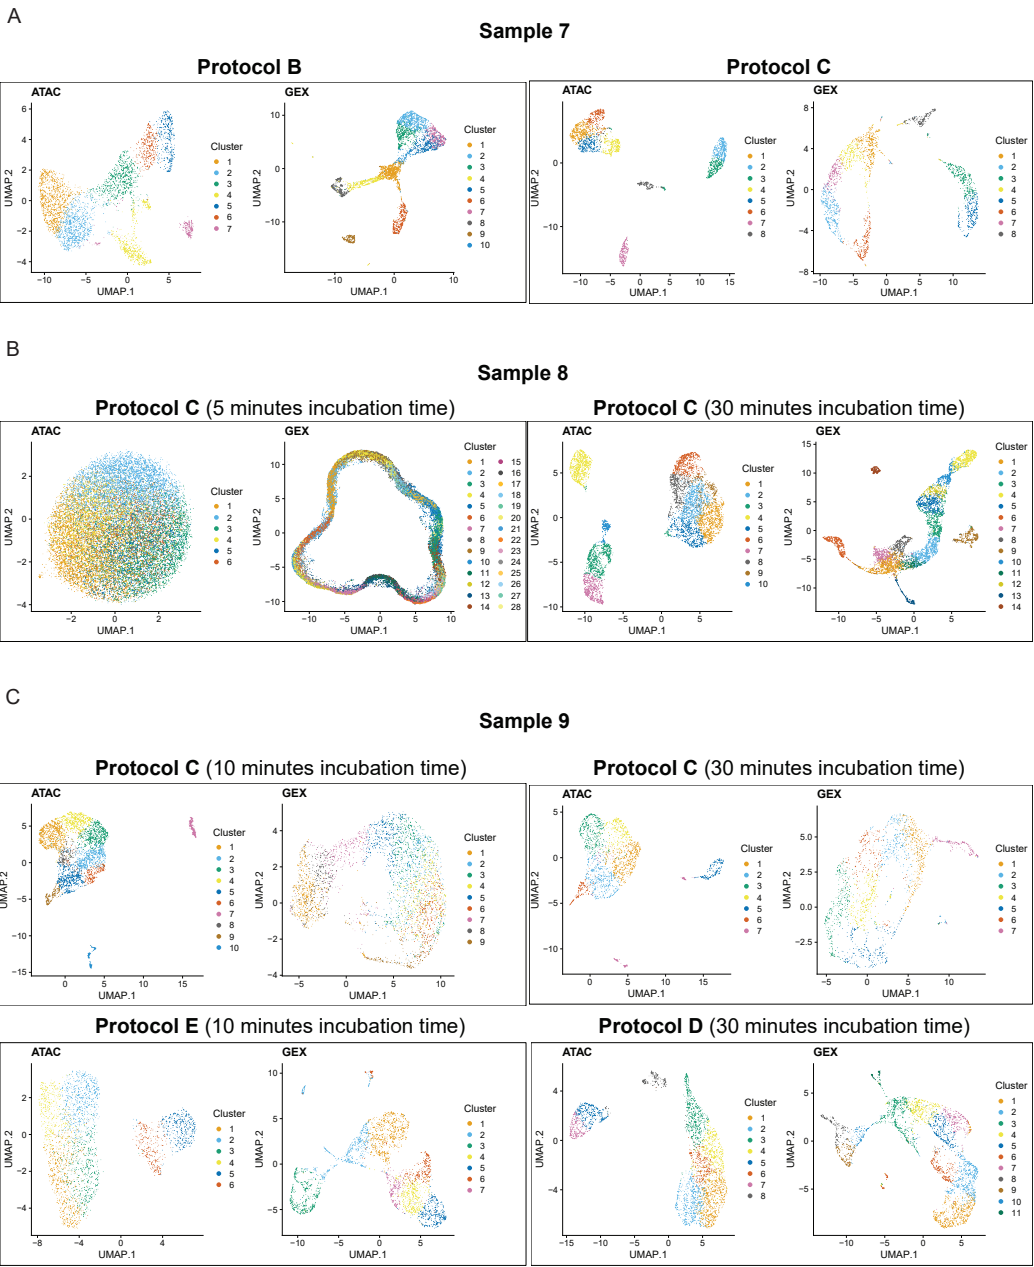

**Figure S3.** UMAP projection of cells from Samples 7 (A), 8 (B), and 9 (C) processed using different protocols and incubation time points.

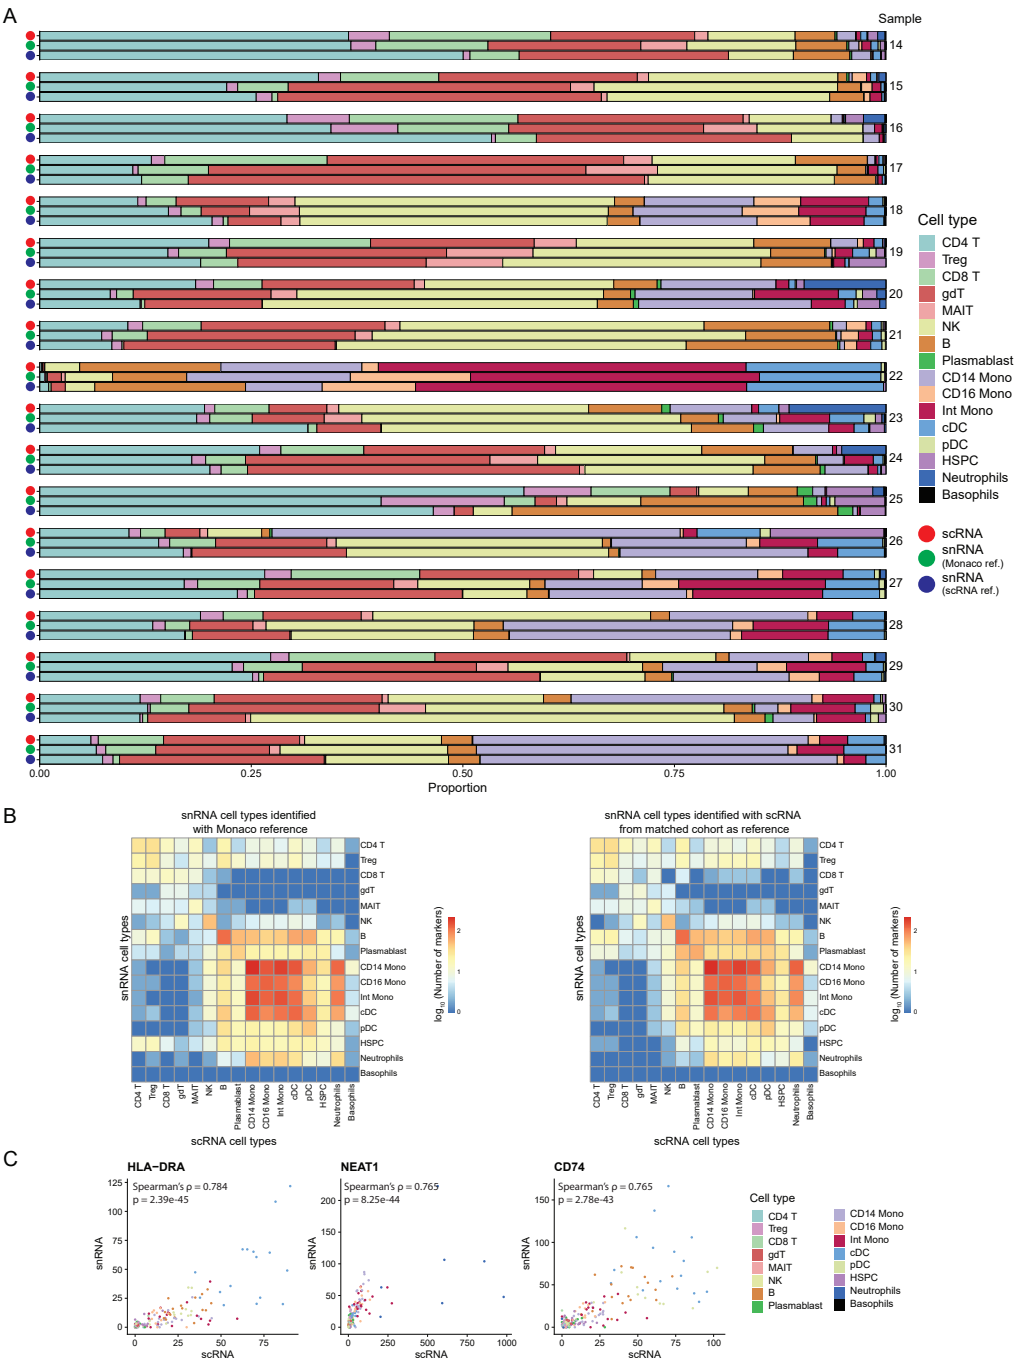

Supplement: Supplementary file 1 [file supplementary]
